1 **Social prediction modulates activity of macaque superior temporal cortex**

2

3 **Authors names and affiliations:**

4 Lea Roumazeilles<sup>1†\*</sup>, Matthias Schurz<sup>1,2†</sup>, Mathilde Lojkiewicz<sup>1</sup>, Lennart Verhagen<sup>1,3,4</sup>, Urs  
5 Schüffelgen<sup>1</sup>, Kevin Marche<sup>1</sup>, Ali Mahmoodi<sup>1</sup>, Andrew Emberton<sup>5</sup>, Kelly Simpson<sup>5</sup>, Olivier  
6 Joly<sup>1</sup>, Mehdi Khamassi<sup>1,6</sup>, Matthew FS. Rushworth<sup>1,3</sup>, Rogier B. Mars<sup>3,4</sup>, Jérôme Sallet<sup>1,7\*</sup>

7 <sup>1</sup> Wellcome Centre for Integrative Neuroimaging, Department of Experimental Psychology,  
8 University of Oxford, Oxford, United Kingdom.

9 <sup>2</sup> Institute of Psychology, University of Innsbruck, Innsbruck, Austria

10 <sup>3</sup> Wellcome Centre for Integrative Neuroimaging Centre for Functional MRI of the Brain  
11 (FMRIB), Nuffield Department of Clinical Neurosciences, John Radcliffe Hospital,  
12 University of Oxford, Oxford, United Kingdom.

13 <sup>4</sup> Donders Institute for Brain, Cognition and Behaviour, Radboud University Nijmegen,  
14 Nijmegen, The Netherlands.

15 <sup>5</sup> Biomedical Sciences Services, University of Oxford, Oxford, United Kingdom

16 <sup>6</sup> Institute of Intelligent Systems and Robotics, Sorbonne Université, CNRS, Paris, France

17 <sup>7</sup> Univ Lyon, Université Lyon 1, Inserm, Stem Cell and Brain Research Institute U1208,  
18 Bron, France

19

20 †These authors contributed equally to this work

21 \*Corresponding authors: [lea.roumazeilles@psy.ox.ac.uk](mailto:lea.roumazeilles@psy.ox.ac.uk), [Jerome.sallet@inserm.fr](mailto:Jerome.sallet@inserm.fr)

22 **Abstract**

23 The ability to attribute thoughts to others, also called theory of mind (TOM), has been  
24 extensively studied. Computationally, the basis of TOM in humans has been interpreted within  
25 the predictive coding framework and associated with activity in the temporo-parietal junction  
26 (TPJ). However, the evolutionary origins of these human mindreading abilities have been  
27 challenged since the concept was coined. Here we identify a brain region in the Rhesus  
28 macaque that shares computational properties with the human TPJ. We revealed, using a non-  
29 linguistic task and functional magnetic resonance imaging, that activity in a region of the  
30 macaque middle superior temporal cortex was specifically modulated by the predictability of  
31 social interactions. As in human TPJ, this region could be distinguished from other temporal  
32 regions involved in face processing. Our result suggests the existence of a precursor for the  
33 theory of mind ability in the last common ancestor of human and old-world monkeys.

34 The ability to attribute mental representations to others, called Theory of Mind (TOM<sup>1</sup>) is key  
35 to complex human social interactions<sup>2,3</sup>. TOM abilities in humans have been most notably  
36 associated with activity in the temporo-parietal junction (TPJ) and the medial prefrontal cortex  
37 (MPFC)<sup>4,5</sup>. The question of TOM's evolutionary origins has, however, been disputed since the  
38 concept was first proposed<sup>1,6,7</sup>. This is partly due to the reliance of human TOM studies on  
39 linguistic stimuli<sup>4</sup>. But even when innovative non-verbal designs are employed, the  
40 interpretation of performances on TOM-like tasks across primate species are highly debated<sup>2,7-  
41 9</sup>.

42 Results from comparative anatomy studies suggest continuity rather than discontinuity  
43 in the anatomical organization of the primate social brain. For instance, the medial prefrontal  
44 cortex (MPFC) maintains a broadly similar organization in macaques and humans<sup>10</sup>, and  
45 human TPJ has a similar connectivity pattern to macaque middle Superior Temporal Sulcus  
46 (midSTS)<sup>11</sup>. Despite evidence that macaque midSTS and MPFC respond to social stimuli<sup>12-19</sup>,  
47 it remains unclear whether these regions support functions resembling TOM.

48 Theoretical developments in computational neuroscience suggest alternative ways to  
49 compare human and animal social abilities. Rather than looking for TOM itself in other species  
50 it may be profitable to seek evidence of more basic computational processes linked to TOM<sup>20-  
51 22</sup>. Computational models describe human TPJ and MPFC activation during social tasks within  
52 a predictive coding framework<sup>3,23</sup>. This framework predicts that deviations from expected  
53 social behaviors should lead to stronger activation in these areas.

54

### 55 **Macaques' midSTS is modulated by social expectation**

56 To investigate whether macaque brain areas signal deviation from social expectation,  
57 we presented 14 Rhesus macaques with a free-viewing functional Magnetic Resonance  
58 Imaging (fMRI) paradigm consisting of videoclips of macaques interacting socially. This  
59 approach has been successfully used to identify brain networks supporting social cognition in  
60 macaques<sup>24</sup> but has not yet been used to identify computations supported in those circuits. In  
61 our videos, social interactions either followed an expected scenario (e.g. continuous grooming  
62 or playing, Video 1-2) or were interrupted by an unexpected event (e.g. grooming or playing  
63 interrupted by a fight; Video 3-4). Several brain areas showed higher activation for the  
64 unexpected than expected social events, including regions belonging to the visual cortex and  
65 oculomotor-related regions (Supplementary Figure 1, Supplementary Table 1). Two clusters in  
66 the midSTS were also identified, which we will refer to as caudal midSTS and rostral midSTS  
67 (Fig. 1a, Supplementary Table 1). The rostral midSTS has often been associated with the  
68 macaque social brain<sup>11,17,25</sup>.

69 To rule out explanations in terms of basic visual features, we first contrasted the neural  
70 response to scrambled videos of unexpected versus expected social interactions which were  
71 matched in terms of luminosity and movement to the original videos (visual control). The  
72 visual control contrast elicited higher activation in the caudal midSTS but not in the more  
73 rostral part of the midSTS (Fig. 2b, Supplementary Table 1, Supplementary Fig. 2a).  
74 Unexpected social interaction videos contain by definition more unexpected movement and  
75 therefore it is not surprising that this visual control would recruit regions in caudal midSTS  
76 that include the motion-sensitive areas MT, FST and MST<sup>25,26</sup>.

77 We then tested the social specificity of the activation observed for social prediction in  
78 a subset of subjects (n=7/14, object control) using non-social scenes containing inanimate  
79 objects. To match closely with the social interaction videos, these videos were designed to  
80 represent situations with or without a departure from an expected and established physical  
81 regularity, such as the location, identity or movement. Regardless of whether we examined  
82 activity at the original threshold ( $z > 3.1$ ) or at a more liberal threshold ( $z > 2.3$ ) to account for  
83 the smaller number of animals, there was no evidence for activity in rostral midSTS but only

84 in caudal midSTS for this object control (Fig. 1b, Supplementary Table 1, Supplementary Fig.  
85 2b). A conjunction analysis between the social prediction contrast and each of our two control  
86 conditions (Supplementary Fig. 2c) confirmed the specificity of the modulation of activity by  
87 social predictability in rostral midSTS cluster.  
88

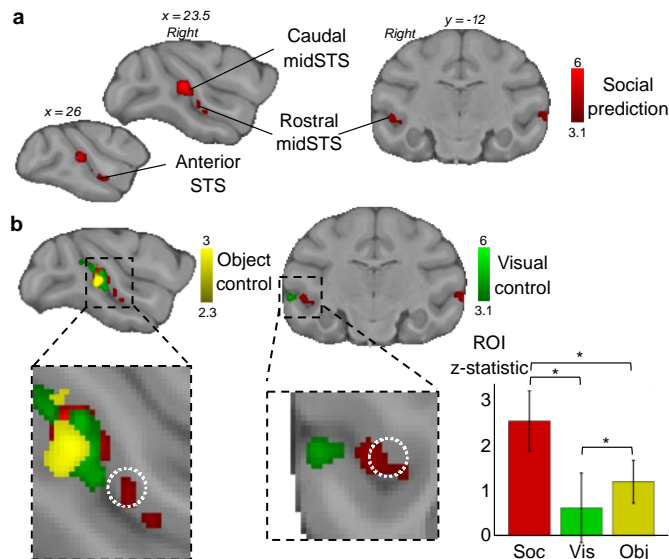

89

90 **Fig. 1 | Modulation of macaque STS activity.** **a**, Social prediction: group contrast of  
91 unexpected versus expected social interaction revealed activity in rostral and caudal midSTS  
92 ( $n=14$ , cluster-corrected at  $z>3.1$ ,  $p<0.05$  FWE corrected). **b**, Overlap between responses to  
93 social prediction and control conditions (visual control:  $n=14$ , cluster-corrected at  $z>3.1$ ; object  
94 control:  $n=7$ , cluster-corrected at  $z>2.3$  and both  $p<0.05$  FWE corrected). The white dotted  
95 circle represents a macaque TPJ-like region identified previously<sup>11</sup>. Mean Z-statistic obtained  
96 in the ROI (white circle) for social prediction (soc), visual control (vis), object control (obj).  
97 Error bars represent standard deviation (Wilcoxon signed-rank test, Bonferroni corrected for  
98 multiple comparison  $p<0.05$ , social x visual:  $p=6.10^{-43}$ , social x object:  $p=3.10^{-43}$ , object x  
99 visual:  $p<1.10^{-21}$ ).

100

101 From here on, we will refer to this specific rostral midSTS region as ‘social prediction  
102 area’ (SPA). It overlaps with cytoarchitectonically defined temporo-parieto-occipital  
103 association area (TPO) and PG associated area of STS (PGa)<sup>27</sup>. From this location, we can also  
104 rule out an overlap with body responsive areas which have been identified either posteriorly or  
105 ventrally to the SPA<sup>24,28</sup>. It has also recently been shown that strategic social signaling in the  
106 rostral midSTS involves a different set of neurons than the ones responding to faces and  
107 bodies<sup>18</sup>. Importantly, the rostral midSTS we identified corresponds to a midSTS region  
108 previously identified for its connectivity pattern most resembling that of human TPJ<sup>11</sup>. Using  
109 this independently defined region of interest (ROI), we observed that social prediction induced  
110 significantly higher activation than control conditions (Fig. 1b).

111 To confirm that the social prediction modulation in the SPA was not due to a  
112 thresholding effect and illustrate the specificity of its activity, we performed the three contrasts  
113 (social prediction, visual control, object control) using the same independent ROI identified  
114 previously<sup>11</sup> to restrict the statistics. We observed a significant activation in the ROI only in  
115 the social prediction contrast and not the two others with a cluster correction (Supplementary  
116 Fig. 3, top). Because the extent of this ROI is quite small, we also performed voxel correction  
117 which showed again the specificity of activation in this region for the social prediction contrast  
118 (181 voxels significant out of the 257 voxels of the ROI) and only a few voxels for the other

119 two on the posterior edge of the ROI (12 for the visual control and 3 for the object control,  
120 Supplementary Fig. 3, bottom).

121

122 While we observed midSTS clusters bilaterally, some hemispheric differences were  
123 noticeable. The right caudal midSTS cluster, unlike the left caudal mid-STS, extended toward  
124 the end of the STS, including V4t on its ventral bank<sup>27</sup>. On the left hemisphere, the rostral  
125 midSTS cluster was located in a different area than the right SPA and had a more lateral  
126 position, extending from the dorsal bank of the STS to area TE on the lateral surface. To  
127 investigate whether the lack of social prediction modulation in the left SPA was indicative of  
128 a thresholding issue or a lateralized function, we defined a large ROI encompassing the whole  
129 STS around the coordinates of the previously mentioned midSTS region sharing  
130 neuroanatomical similarities with the human TPJ<sup>11</sup>. With the same social prediction contrast  
131 but restricted on either the left or right hemisphere of this enlarged ROI, we found that a cluster  
132 survives the statistical correction in both hemispheres. Rather than a purely lateralized function,  
133 these results show that the modulation by social prediction in the SPA was bilateral but less  
134 robust in the left hemisphere (Supplementary Fig. 4).

135

136 Finally, we conducted a separate free-viewing experiment with a different set of four  
137 monkeys. We collected sessions under different experimental conditions to verify that the  
138 social prediction modulation in SPA is robust to replication and to disruption of other brain  
139 regions. Due to the passive nature of the task, it was not possible to causally address the role  
140 of the midSTS. Instead we used repetitive Transcranial Ultrasound Stimulation (TUS) protocol  
141 to disturb brain activity over key regions of interests to test for potential confounding effects.  
142 Repetitive TUS could disrupt the normal activity of the stimulated region for at least two hours  
143 post-stimulation<sup>29</sup>. With the sessions with no-prior stimulation, we replicated the previous  
144 results, revealing the same rostral midSTS region as specifically modulated by social prediction  
145 (Supplementary Fig. 5, Supplementary Table 2). In the replication, the visual and object control  
146 contrasts did not yield any significant results in rostral mid-STS and there was no conjunction  
147 with the social prediction contrast (Supplementary Fig. 6).

148 In both the original and replicated studies, we observed a cluster just anterior to the  
149 genu of the arcuate sulcus, an oculomotor region often referred to as the Frontal Eye Field  
150 (FEF). To rule out a putative attentional or oculomotor confound with the social prediction  
151 modulation, we used, prior to the awake fMRI data acquisition, a repetitive TUS stimulation  
152 of the FEF. In separate sessions the Anterior Cingulate Cortex (ACC), a region known for its  
153 role in social cognition<sup>12,17,24</sup>, was targeted as an active control region. The stimulations do  
154 perturb some brain network as they have an effect on two relevant contrasts: a simple visual  
155 contrast (videos versus black screen) and a social contrast (social videos versus scrambled)  
156 (Supplementary Fig. 7). However, in our contrast of interest, the social prediction, no  
157 difference between stimulation and non-stimulation sessions could be observed. These results  
158 show that SPA was modulated by the predictability of social interaction, independently of  
159 attentional or oculomotor effect led by the FEF. They confirmed the social specificity of the  
160 activity modulation in the SPA.

161

### 162 **Relationship of SPA with the face responsive brain network**

163 To further test specificity of SPA responses and their relationship with known STS  
164 functions, we investigated how SPA are related to face patches, a set of face-responsive areas  
165 located in STS and inferotemporal cortex<sup>30</sup>. We analyzed awake fMRI data from a face  
166 localizer collected in our initial group of 14 Rhesus macaques. Our localizer consisted of  
167 pictures of neutral and emotional (e.g. lip-smacking, open mouth...) macaque faces and their  
168 scrambled equivalent during fMRI. This method has been shown to identify the face-

169 responsive brain regions as opposed to the face-selective brain regions by using a localizer  
170 combining face, body and object pictures<sup>31</sup>. In 12 out of 14 animals we were able to identify  
171 all six face patches previously reported<sup>19,30</sup>: Posterior Lateral (PL), Middle Lateral (ML),  
172 Middle Fundus (MF), Anterior Lateral (AL), Anterior Fundus (AF) and Anterior Ventral (AM)  
173 (Fig. 2a, Supplementary Fig. 7, Supplementary Table 3).

174 A conjunction analysis revealed no significant overlap between face patches and SPA  
175 (Fig. 2b). At the single-subject level, we noticed SPA peaks tended to be located in a more  
176 dorsal/fundus section of mid-STS, and therefore in a distinct cytoarchitectonic area compared  
177 to face patches (Supplementary Fig. 8). Our results are supported by recent findings showing  
178 that neurons in the ventral bank of the midSTS signal selectively cooperative social behavior,  
179 independently from visual sensitivity to faces and bodies<sup>18</sup>.

180

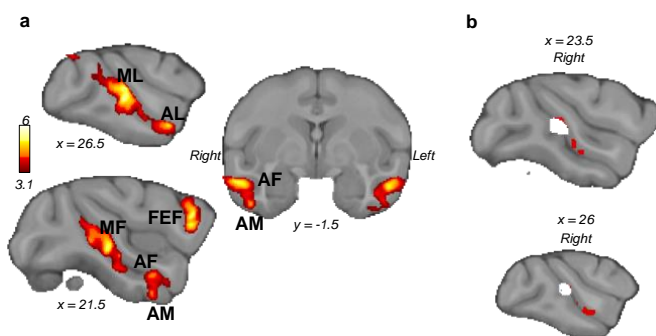

181

182 **Fig. 2 | Face-responsive areas in macaques.** **a**, Macaque group contrast of face versus  
183 scrambled pictures (n=14, cluster-corrected at  $z>3.1$ ,  $p<0.05$  FWE corrected). **b**, Conjunction  
184 analysis (white) of social prediction contrast activation (red) and face patches (cluster-  
185 corrected at  $z>3.1$ ,  $p<0.05$  FWE corrected).

186

187 We then conducted a resting state fMRI analysis to determine the relationship between  
188 the SPA and the face patches. We computed the functional connectivity profiles of macaques'  
189 SPA with both full correlation as available in humans and a more specific partial correlation.  
190 The full correlation revealed that macaques' SPA coupling with face responsive regions and  
191 other visual areas (Fig. 3a) which was absent for human TPJ connectivity profile (coordinates  
192 from<sup>11</sup> HCP resting-state data<sup>32</sup>, Fig. 3b). However, computing the partial connectivity, by  
193 regressing out the time series of all face patches, reveals that SPA is specifically coupled with  
194 dorsal STS, posterior cingulate and prefrontal cortex, resembling the human TPJ connectivity  
195 profile (Fig. 3c). Similarly, computing the partial connectivity of the face patches, by  
196 regressing out the time series of the SPA (and its anterior section) revealed a network involving  
197 mostly STS and the visual cortex (Fig. 3d). In summary, connectivity results provide further  
198 evidence for the distinction of face patch and SPA systems, but also reveal stronger interactions  
199 between the two systems in macaques than in humans.

200

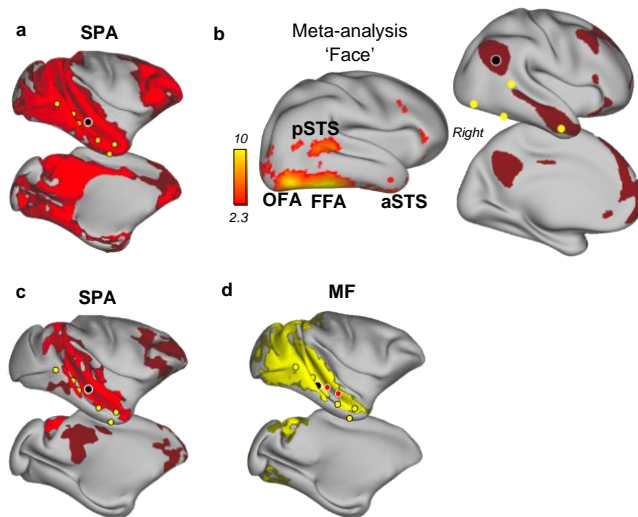

201  
202

203 **Fig. 3 | Face-patch system and resting-state functional connectivity in macaques and**  
204 **humans. a,** Resting-state connectivity associated with SPA (black circle) from a full  
205 correlation to the whole brain (face patches are yellow circles). **b,** Human comparison. Right:  
206 meta-analysis results (Neurosynth) for ‘face’, displayed on right hemisphere (pSTS: posterior  
207 STS, OFA: Occipital Face Area, FFA: Fusiform Face Area). Left: resting-state connectivity of  
208 TPJ (Cohen’s *d* effect size thresholded at 0.6). **c,** Resting-state connectivity associated with  
209 SPA (black circle) from a partial correlation to the whole brain while accounting for face  
210 patches connectivity. **d,** Resting-state connectivity associated with MF (black circle) from a  
211 partial correlation to the whole brain while accounting for SPA connectivity (SPA and its  
212 anterior section are red circles). For all macaque resting state: *n*=12, TFCE corrected, FWE  
213 corrected at  $p < 0.01$  in bright color and  $0.01 < p < 0.05$  in dark color.

214

## 215 Discussion

216 Overall, our results revealed a brain region in macaques’ rostral midSTS that is  
217 specifically sensitive to expectation violation during free-viewing of social scenes. This region  
218 is distinct from previously identified functional module in the STS called face, gaze-following,  
219 or body patches<sup>19,28,30,33</sup>. Its location on the dorsal bank / fundus of the STS is compatible with  
220 a functional module identified as being responsive to natural social scenes<sup>34</sup>. Here, we were  
221 able to characterize a computational property associated with this region. We interpret this  
222 response in a predictive coding framework providing the signature of the neuro-computational  
223 mechanism supporting mentalizing abilities in humans<sup>3</sup>. Evidence for this type of coding has  
224 been uncovered in adjacent regions of the temporal cortex for processing non-social  
225 information in macaques<sup>35</sup>. Furthermore, the midSTS region sensitive to prediction in the social  
226 domain corresponds to the region that was previously shown to share similar connectivity  
227 profiles with the human TPJ<sup>11</sup>.

228 Our approach, built on theoretical debates about cross-species differences in TOM<sup>2,7,21</sup>,  
229 provides evidence for the existence in the last common ancestor to humans and macaques of a  
230 precursor neural architecture supporting computations that have been associated with TOM in  
231 human TPJ<sup>21</sup>. Unlike in human studies<sup>4,5</sup>, our social prediction analysis did not reveal any  
232 change of activity in macaque MPFC. This may reflect the nature of the passive free-viewing  
233 tasks compared to the active decision-making tasks used in humans<sup>23,36</sup>.

234 Our results suggest an evolutionary trajectory in brain organization that in humans has  
235 resulted in area TPJ. The connectivity of face-responsive areas and the SPA differs in both  
236 humans and rhesus macaques but the two circuits are more integrated in macaques; macaque  
237 SPA retains connectivity to face patches while human TPJ shares little connectivity with the

238 face-responsive system. These between-species differences might reflect greater specialization  
239 of social brain areas such as TPJ in humans that may have occurred in association with the  
240 expansion and reorganization<sup>37</sup> of the temporal cortex since the last common ancestor to  
241 humans and old-world monkeys 25 to 29 millions years ago.  
242

## 243 **Methods**

244

### 245 **Data acquisition**

246

#### 247 Animals

248 14 healthy Rhesus macaque monkeys (*macaca mulatta*, 13 males, 1 female) performed a  
249 set of free-watching tasks over a period of six months. All procedures were conducted under  
250 licenses from the United Kingdom (UK) Home Office in accordance with the UK Animals  
251 (Scientific Procedures) Act 1986. See Supplementary Table 4 for a detailed account of the  
252 number of runs per conditions and per monkeys.  
253

#### 254 Stimuli

255 Pictures and videos recorded at the breeding center and at the Oxford research colony  
256 were the basis of the video clips used in four experimental conditions. In addition, two other  
257 experimental conditions based on non-social stimuli were also used. Altogether these six  
258 conditions and an awake resting-state acquisition (not included in this study) were presented  
259 in pseudo-randomized order. Three conditions described below have been used for the purpose  
260 of the current study. No more than three repetitions of a given condition was presented per day,  
261 the same condition was never repeated consecutively, and two different orders of presentation  
262 of the videos/pictures for a given condition were used to further limit habituation. For all  
263 conditions, the animals were not asked to fixate their gaze, to conserve the most natural  
264 behavior. No reward delivery occurred during the presentation of stimuli. Reward was instead  
265 delivered in between two runs to maintain animal attention to the stimuli.

266 First, we selected videos containing expected (ex: grooming or playing) and unexpected  
267 (ex: unexpected deviation from grooming or playing) social behaviors which were highly  
268 ecologically valid for the monkeys. The videos were presented for 5.5 seconds each and were  
269 combined in a 12-second block with 0.5 second before each video. Each block was followed  
270 by 10 seconds of rest (black screen). We presented three blocks of social unpredicted, three  
271 blocks of social predicted and three blocks for each of their scrambled versions respectively in  
272 a random order.

273 Based on a similar principle (deviation from expected interaction) we created videos  
274 showing expected and unexpected object interactions based on simple physical regularity. In  
275 keeping with the social videos, object scenes showed events that could be unpredicted based  
276 on either location (object appearing at unexpected location), identity (a new object appears), or  
277 movement (sudden change in movement patterns shown up to now). For instance, a video in  
278 which objects are falling at constant rate is considered predictable while an unpredictable  
279 scenario would see this rate suddenly changed without an obvious cause. The timings for these  
280 conditions were the same than for the social prediction. We presented three blocks of object  
281 unpredicted interactions, three blocks of object predicted interactions and three blocks for each  
282 of their scrambled version respectively. This task was only done on seven of the 14 monkeys.

283 For the face localizer, the task followed a block design with each block of 12 seconds  
284 consisting of the presentation of eight images for 1 second each followed by 500 ms of black  
285 screen. A resting period of 10 seconds (black screen) was inserted between the face blocks.  
286 Each run was composed of three blocks of neutral faces, three blocks of emotional faces



287 (aggressive or lip-smacking) and six blocks of scrambled faces. This type of face localizer is  
288 known to capture face-responsive areas<sup>31</sup>.

289

### 290 Awake and anaesthetized fMRI

291 The fMRI data were acquired in a horizontal 3 Tesla MRI scanner with a full-size bore  
292 using a four-channel, phased-array, receive-only radio-frequency coil in conjunction with a  
293 local transmission coil (Windmiller Kolster Inc, Fresno, USA). The animals were head-fixed  
294 in a sphinx position in an MRI-compatible chair (Rogue Research, CA). fMRI data were  
295 acquired using a gradient-echo T2\* echo planar imaging (EPI) sequence with the following  
296 parameters:  $1.5 \times 1.5 \times 1.5$  mm resolution, 36 axial interleaved slices with no gap, TR of 2280  
297 ms, TE of 30 ms and 130 volumes per run. Proton-density-weighted images using a gradient-  
298 refocused echo (GRE) sequence (TR = 10 ms, TE = 2.52 ms) were acquired as reference for  
299 offline image reconstruction.

300

301 Resting-state fMRI data and anatomical scans were collected under anesthesia for the  
302 same animals according to a previously used protocol<sup>10</sup>. fMRI Resting-state connectivity  
303 patterns are well conserved under anesthesia<sup>38</sup>, and have been used for conducting human-  
304 macaque comparisons<sup>10,11,38</sup>. Anesthesia was induced using intramuscular injection of  
305 ketamine (10 mg/kg) combined with either xylazine (0.125–0.25 mg/kg) or midazolam (0.1  
306 mg/kg) and buprenorphine (0.01 mg/kg). Macaques also received injections of atropine (0.05  
307 mg/kg), meloxicam (0.2 mg/kg), and ranitidine (0.05mg/kg). Anesthesia was maintained with  
308 isoflurane. Isoflurane was selected because it has been demonstrated that resting-state networks  
309 are still present using this agent for anesthesia<sup>38</sup>. The anesthetized animals were placed in an  
310 MRI-compatible stereotactic frame (Crist Instrument) in a sphinx position within a horizontal  
311 3T MRI scanner with a full-size bore. The same coils as for awake scans were used for data  
312 acquisition. Whole-brain BOLD fMRI data were collected using the following parameters:  $1.5$   
313  $\times 1.5 \times 1.5$  mm resolution, TR of 2280 ms, TE of 30 ms, 36 axial interleaved slices with no  
314 gap and 1600 volumes. Structural scans were acquired in the same session using a T1-weighted  
315 MP-rage sequence (no slice gap,  $0.5 \times 0.5 \times 0.5$  mm resolution, TR of 2500 ms, TE of 4.01 ms  
316 and 128 slices).

317

### 318 **Preprocessing**

319

320 All data were preprocessed and analyzed using tools from the FMRIB Software Library  
321 (FSL, version 5.0.10)<sup>39</sup>, the Advanced Normalization Tools (ANTs, version 2.1.0) and the  
322 Connectome workbench software ([www.humanconnectome.org](http://www.humanconnectome.org)). We also used MATLAB  
323 (version R2016a, The MathWorks, Inc., Natick, Massachusetts, United States) and bash codes  
324 from the Magnetic Resonance Comparative Anatomy toolbox (MrCat,  
325 [www.neuroecologylab.org](http://www.neuroecologylab.org)) and custom-made codes.

326

### 327 Task-fMRI preprocessing

328 Task-fMRI data were preprocessed following a dedicated non-human primate fMRI  
329 processing pipeline as part of the MrCat toolbox. In short, after offline SENSE reconstruction  
330 of the EPI image (Windmiller Kolster Scientific, USA), motion-induced time-varying slice  
331 distortions were corrected using restricted non-linear registration, first to a run-specific high-  
332 fidelity EPI, then to each animal's T1w structural image, and finally to group-specific template  
333 in CARET macaque F99 space<sup>40</sup>. Brain extraction, bias-correction, and template registration  
334 of the T1w structural image were achieved in an interdependent iterative approach. The  
335 resultant high-fidelity removal of non-brain tissue could be back-projected to the EPI following  
336 non-linear registration. A nuisance regressor design matrix was created to account for volumes

337 with excessive movement, signal variability associated with motion-induced distortion artifacts  
338 and non-brain noise components. For the video tasks, we did not use the regressors for the non-  
339 brain component as they were correlated with the timing of the task. Further steps were  
340 implemented using the FEAT toolbox. We performed spatial smoothing using a Gaussian of 3  
341 mm FWHM (full-width at half minimum) kernel, grand mean intensity normalization and high-  
342 pass temporal filtering (Gaussian-weighted least-squares straight-line fitting, with  $\sigma = 100$   
343 s).

344

#### 345 Resting-state fMRI preprocessing

346 The detailed preprocessing pipeline for the resting-state fMRI has been described  
347 elsewhere<sup>29,41</sup>. Briefly, after reorientation to the same convention for all functional EPI  
348 datasets, the first volumes were discarded to ensure a steady radio frequency excitation state.  
349 EPI timeseries were motion corrected using MCFLIRT<sup>42</sup>. Brain extraction, bias-correction,  
350 and registration were achieved for the functional EPI datasets in an interdependent iterative  
351 manner. The mean of each functional dataset was registered to its corresponding T1w image  
352 using rigid-body boundary-based registration (FLIRT<sup>42,43</sup>). EPI signal noise was reduced both  
353 in the frequency and temporal domain. The functional timeseries were high-pass filtered with  
354 a frequency cut-off at 2000 s. Temporally cyclical noise, for example originating from the  
355 respiration apparatus, was removed using band-stop filters set dynamically to noise peaks in  
356 the frequency domain of the first three principal components of the timeseries. To account for  
357 remaining global signal confounds we considered the signal timeseries in white matter and  
358 meningeal compartments, and their confound parameters were regressed out of the BOLD  
359 signal for each voxel. Following this confound cleaning step, the timeseries were low-pass  
360 filtered with a cut-off at 10 s. The data were transformed to the surface space using the F99  
361 template and spatially smoothed using a 2.8 mm FWHM gaussian kernel, while considering  
362 the folding of the cortex. Lastly, the data timeseries were demeaned to prepare for functional  
363 connectivity analyses.

364

#### 365 **Analysis**

366

##### 367 Contrasts

368 For the awake fMRI, the first-level analysis was carried out using FEAT for each run<sup>44,45</sup>.  
369 Simple generalized linear model (GLM) designs were defined. For the social prediction task,  
370 we used four Explanatory Variables (EVs), accounting for the social expected scene, social  
371 unexpected scene, and one for each of their scrambled versions. The main contrast of interest  
372 was between social unpredicted versus social predicted. We defined one more contrast as the  
373 scrambled unpredicted versus scrambled predicted to control for activity related to visual  
374 features (e.g. motion, luminance). We used a similar approach for the object prediction. For  
375 the face task, four EVs were used to account respectively for the neutral face blocks, the  
376 emotional face blocks, the neutral scrambled blocks and the emotional scrambled blocks. The  
377 main contrasts were defined as face images versus scrambled images and emotional faces  
378 versus neutral faces.

379 In each task on top of the main contrasts, we defined a control contrast to detect neural  
380 activation when an image or video was present on the screen compared to rest period, to  
381 confirm whether the monkeys were engaged during the task. Indeed, as the task did not provide  
382 reward to the animals, they could disengage and fall asleep. We therefore excluded runs in  
383 which this control contrast elicited no or limited activation in the visual cortex. This method  
384 excluded 5 runs for the social prediction task and 3 runs for the object prediction task.

385 We applied a gamma hemodynamic response function convolution with a phase of 0  
386 seconds, a standard deviation of 1.5 seconds and a delay of 3 seconds and the same temporal

387 filtering as for the data. The movement regressors previously described were also used as  
388 additional confounds.

389 In the second-level analysis, after registration to standard space we pooled together runs  
390 from the same monkeys. A fixed-effect analysis was performed at the subject level. Finally, a  
391 third-level analysis was carried out to obtain the results at the group level using FLAME 1 as  
392 mixed-effects analysis with a cluster-forming  $z$ -threshold of 3.1 and corrected for Family-Wise  
393 Error (FWE) at  $p < 0.05$ . The  $z$ -thresholds were chosen according to previous literature<sup>46</sup> which  
394 advise to use the threshold of 3.1 with Flame 1 mixed-effect to avoid false positives. To test  
395 for a potential overlap of object prediction with social prediction, we used a more liberal  
396 threshold at  $z = 2.3$ . In fact, when no complete overlap is expected, as here, this approach  
397 increases the sensitivity of the test allowing more stringent inferences.

398

### 399 Conjunction

400 We verified the specificity of the modulation by the social prediction videos by  
401 performing a series of conjunction analysis at the group level. All conjunctions are performed  
402 according to previous literature<sup>47</sup>. We defined an STS mask comprising the grey matter of the  
403 STS excluding the very posterior parietal portion, to restrict the conjunction and set the cluster  
404 forming threshold at  $z = 3.1$  and  $p < 0.05$ . For the conjunction between object prediction and  
405 social prediction we used only the same seven animals available in both datasets. Because no  
406 significant conjunction was found between the object and social prediction at the  $z > 3.1$   
407 threshold, we lowered the threshold to 2.3, as above to increase the sensitivity and account for  
408 the smaller number of animals in this condition.

409

### 410 Comparison of mean uncorrected $z$ -statistic

411 To further confirm that this result was not due to a thresholding effect, we conducted  
412 additional analyses. We defined a Region of Interest (ROI) around the coordinates found in an  
413 anterior study<sup>11</sup> (most similar connectivity profile to human TPJ) with a 5 voxel radius. First,  
414 we computed the mean uncorrected  $z$ -statistic across voxels in this ROI for our three conditions  
415 (social prediction, visual control and object control). The standard deviation is defined as the  
416 square root of the variance of the  $z$ -statistic. We performed a Wilcoxon signed-rank test  
417 between conditions and corrected for multiple comparison using the Bonferroni method.  
418 Secondly, we performed the same third-level contrasts as before but restricting the statistics to  
419 the rostral midSTS ROI as defined before. Because the extent of this ROI is quite small, we  
420 performed both cluster- and voxel-thresholding corrections.

421

### 422 Hemispheric and regional specificity

423 We also investigated the hemispheric specificity of the social prediction modulation by  
424 analyzing the same contrast with an ROI either on the left or on the right hemisphere as  
425 performed in the literature<sup>48</sup>. The ROI was defined as a coronal mask (5 slices) encompassing  
426 the whole STS at the level of the small ROI mentioned earlier, around the coordinates found  
427 in the anterior study<sup>11</sup>. This ROI was defined to overcome the issue of thresholding by reducing  
428 the number of voxels and to enlarge the search area so that we could capture clusters even if  
429 they were overlapping the borders of the small ROI (accounting for inter-individual  
430 differences).

431 The MPFC has also been identified as part of the social brain in macaques<sup>17</sup>. Therefore,  
432 we conducted another ROI analysis targeting the Anterior Cingulate Cortex (ACC) to restrict  
433 the statistics to this previously identified region<sup>17</sup>. No activity modulation of the ACC by the  
434 social prediction was revealed with this analysis.

435

### 436 Resting-data fMRI analysis

437 For the anaesthetized resting-data fMRI, in each monkey individually, we identified  
438 bilateral face patches from peak activation at the second-level analysis and based on the  
439 definitions of a previous study<sup>30</sup>. We obtained the middle fundus (MF) and middle lateral (ML)  
440 in all monkeys, the anterior lateral (AL), the anterior fundus (AF) and the anterior medial (AM)  
441 in 13 monkeys and the posterior lateral (PL) in 12 monkeys. When the face patch was present  
442 on only one hemisphere we defined the opposite hemisphere face patch as its symmetric voxels.  
443 We carried on the analysis on the 12 monkeys where we could find all the face patches in at  
444 least one hemisphere. Each face patch location was mapped to surface space and a ROI was  
445 made of a circle of 2mm geodesic distance giving all ROIs the same size. We followed the  
446 same procedure for the social prediction area (SPA) and defined an anterior SPA ROI which  
447 was part of the same cluster but could be found in all monkeys, insuring that we cover the  
448 entirety of the modulation location. We extracted the time series of each of these ROIs (six for  
449 face patches, two for social prediction) and computed their correlation with timeseries of the  
450 whole brain. We also performed a partial correlation where we regressed out the mean time  
451 series of all face patches from the SPA and the time series of the SPA from the face patches to  
452 obtain their specific connectivity. We then computed the correlation of these more specific  
453 time series to the whole brain. We therefore obtained two maps describing how each ROI  
454 connects to the rest of the brain for each monkey using both full correlation and partial  
455 correlation. We merged all monkeys for each seed and performed a non-parametric  
456 permutation inference using PALM<sup>49</sup> and performing the maximum number of permutations  
457 (in this case sign-flipping for a one-sample t-test). Clusters were defined with the threshold-  
458 free cluster enhancement (TFCE) method which enhances the cluster-like structures but keep  
459 the voxel dimension of the data and were corrected for multiple comparison using the Family-  
460 Wise-Error method.

461

462 For visualization, some of the results were projected onto the F99 surface using tools from  
463 the HCP workbench and the inflated surfaces from a published study<sup>50</sup> (Supplementary Fig 8).

464

465

## 466 **Human Data**

467

468 For the face task, we used the Neurosynth platform (Created and maintained by Tal  
469 Yarkoni, supported by NIH award R01MH096906) for automated meta-analysis that we  
470 probed with the word ‘faces’. The resulting meta-analysis map from 864 studies was then z-  
471 stats thresholded at 2.3 and projected onto a standard MNI surface. The map is corrected using  
472 a false discovery rate (FDR) approach, with an expected FDR of 0.01.

473 For the resting-state human study, data were provided by the Human Connectome Project, WU-  
474 Minn Consortium (Principal Investigators: David Van Essen and Kamil Ugurbil;  
475 1U54MH091657) funded by the 16 NIH Institutes and Centers that support the NIH Blueprint  
476 for Neuroscience Research; and by the McDonnell Center for Systems Neuroscience at  
477 Washington University. We specifically used the group-average structural and functional MRI  
478 data from the HCP S1200 data release (March 2017). This dataset, available on-line at  
479 <https://www.humanconnectome.org>, allowed us to access task-related data but also resting-  
480 state connectivity network and atlases. The connectivity of TPJ was obtained from a ROI of  
481 2mm geodesic distance around the TPJ coordinates defined as a in previous study<sup>51</sup>.

482

## 483 **Replication and Transcranial Ultrasound Stimulation**

484 One year after the first acquisition batch, we were able to acquire additional data for four  
485 animals (T2, T3, T4 and an additional monkey V1). Therefore, we conducted a replication

486 study using 6 sessions for each of the conditions per animal (social prediction: 24 sessions,  
487 visual control: 24 sessions, object control: 24 sessions). We followed the exact same procedure,  
488 except for some technical acquisition and analysis details that we describe here. Data were  
489 collected with a 3-Tesla MRI scanner with a full size bore and we used the four-channel,  
490 phased-array, receive-only radio-frequency coil in conjunction with a local transmission coil  
491 (Windmiller Kolster Inc, Fresno, USA). We used the exact same acquisition protocol.  
492 Concerning the analysis, we restrained our analysis to two levels, because of the limited amount  
493 of data and because this is the most commonly used approach when having the same number  
494 of sessions for each animal. At threshold level 3.1, we did not obtain any significant result, but  
495 this was expected considering the lower amount of data. Therefore, we lowered the threshold  
496 to 2.3 and performed the same conjunction analysis and calculated the mean uncorrected z-  
497 statistic across voxels in this ROI as in the initial study.

498 To assess if attentional or oculomotor related neural activity could explain the  
499 modulation by social prediction in the SPA, we performed Transcranial Ultrasound Stimulation  
500 (TUS) on the same macaques used for the replication just prior to the fMRI free-viewing task.  
501 We stimulated the Frontal Eye Field (FEF) as it is involved in attention and oculomotor  
502 movement such as saccades<sup>52,53</sup>, and was also revealed in our social prediction analysis. As a  
503 control region, we stimulated the ACC which is involved in the extended social brain. The  
504 impact of TUS on FEF and ACC and their consequence on behavior have already been  
505 demonstrated<sup>41,52-54</sup>. We also collected control data for which no stimulation was performed  
506 (note that these are the data used in the replication). For these three stimulation conditions, we  
507 acquired 6 runs per monkeys per conditions (social prediction, visual control, object control).  
508 Control days were interleaved with TUS sonication days. TUS was performed using the same  
509 protocol as previously published<sup>54,55</sup> adapting the focal depth of the transducer to the desired  
510 coordinates. Note that one FEF session for one animal was conducted with a higher intensity  
511 (60% duty cycle instead of 30%) which resulted in a localized skin trauma. A sequential  
512 stimulation was performed to target the left and right FEF<sup>55</sup>. A unique stimulation was  
513 performed on the midline for achieving a bilateral ACC stimulation<sup>54</sup>. Briefly, a single-element  
514 ultrasound transducer was used for 40 s. It was positioned with the help of Brainsight  
515 neuronavigation system (Rogue Research) so that the focal spot was centered on the targeted  
516 brain region, namely the FEF on the anterior bank of the arcuate sulcus (left FEF MNI  
517 coordinates +/-SD:  $x = -14.4 \pm 0.9$ ,  $y = 4.9 \pm 2.5$ ,  $z = 13.3 \pm 1.4$ ; right FEF:  $x = 15 \pm 1.2$ ,  
518  $y = 4.2 \pm 1.6$ ,  $z = 11.8 \pm 1.5$ ) and the controlled region: the ACC rostral to the genu of the  
519 corpus callosum (MNI coordinates +/-SD :  $x = 0 \pm 0.9$ ,  $y = 15.5 \pm 1.5$ ,  $z = 6.5 \pm 1.0$ ). fMRI  
520 data acquisition, preprocessing and analysis were performed as described for the replication.  
521 To compare control condition contrasts with stimulation condition contrasts we performed a  
522 Two-Sample Paired T-Test, regressing out the mean of each subject so that it would not  
523 interfere with the estimation of the difference between stimulation conditions. To assess that  
524 the stimulations had any effect, we compared a simple visual contrast (videos versus black  
525 screen) and a social contrast (social videos versus scrambled). Having established that  
526 stimulations did change some of the brain task-related modulation, we compared the contrast  
527 of interest: the social prediction. We used a whole brain analysis as well as an ROI analysis.  
528 This ROI combined the left and right ROI defined for the hemispheric analysis resulting in a  
529 coronal mask encompassing the whole STS bilaterally at the level of the small ROI mentioned  
530 earlier. This ROI was defined to overcome the issue of thresholding and inter-individual  
531 difference.

## 532 References

- 533 1. Premack, D. & Woodruff, G. Does the chimpanzee have a theory of mind? *Behav.*  
534 *Brain Sci.* **1**, 515–526 (1978).
- 535 2. Heyes, C. M. & Frith, C. D. The cultural evolution of mind reading. *Science (80-. )*.  
536 **344**, 1243091–1243091 (2014).
- 537 3. Koster-Hale, J. & Saxe, R. Theory of Mind: A Neural Prediction Problem. *Neuron* **79**,  
538 836–848 (2013).
- 539 4. Schurz, M., Radua, J., Aichhorn, M., Richlan, F. & Perner, J. Fractionating theory of  
540 mind: A meta-analysis of functional brain imaging studies. *Neurosci. Biobehav. Rev.*  
541 **42**, 9–34 (2014).
- 542 5. Behrens, T. E. J., Hunt, L. T. & Rushworth, M. F. S. The Computation of Social  
543 Behavior. *Science (80-. )*. **324**, 1160–1164 (2009).
- 544 6. Call, J. & Tomasello, M. Does the chimpanzee have a theory of mind? 30 years later.  
545 *Trends Cogn. Sci.* **12**, 187–192 (2008).
- 546 7. Meunier, H. Do monkeys have a theory of mind? How to answer the question?  
547 *Neurosci. Biobehav. Rev.* **82**, 110–123 (2017).
- 548 8. Krupenye, C., Kano, F., Hirata, S., Call, J. & Tomasello, M. Great apes anticipate that  
549 other individuals will act according to false beliefs. *Science (80-. )*. **354**, 110–114  
550 (2016).
- 551 9. Drayton, L. A. & Santos, L. R. A decade of theory of mind research on cayo santiago:  
552 Insights into rhesus macaque social cognition. *Am. J. Primatol.* **78**, 106–116 (2016).
- 553 10. Sallet, J. *et al.* The Organization of Dorsal Frontal Cortex in Humans and Macaques. *J.*  
554 *Neurosci.* **33**, 12255–12274 (2013).
- 555 11. Mars, R. B., Sallet, J., Neubert, F.-X. & Rushworth, M. F. S. Connectivity profiles  
556 reveal the relationship between brain areas for social cognition in human and monkey  
557 temporoparietal cortex. *Proc. Natl. Acad. Sci.* **110**, 10806–10811 (2013).
- 558 12. Chang, S. W. C., Gariépy, J.-F. & Platt, M. L. Neuronal reference frames for social  
559 decisions in primate frontal cortex. *Nat. Neurosci.* **16**, 243–250 (2013).
- 560 13. Noritake, A., Ninomiya, T. & Isoda, M. Social reward monitoring and valuation in the  
561 macaque brain. *Nat. Neurosci.* **21**, 1452–1462 (2018).
- 562 14. Haroush, K. & Williams, Z. M. Neuronal Prediction of Opponent’s Behavior during  
563 Cooperative Social Interchange in Primates. *Cell* **160**, 1233–1245 (2015).
- 564 15. Rudebeck, P. H. A Role for the Macaque Anterior Cingulate Gyrus in Social  
565 Valuation. *Science (80-. )*. **313**, 1310–1312 (2006).
- 566 16. Roy, A., Shepherd, S. V. & Platt, M. L. Reversible inactivation of pSTS suppresses  
567 social gaze following in the macaque ( *Macaca mulatta* ). *Soc. Cogn. Affect. Neurosci.*  
568 **9**, 209–217 (2014).
- 569 17. Sallet, J. *et al.* Social Network Size Affects Neural Circuits in Macaques. *Science (80-.*  
570 *)*. **334**, 697–700 (2011).
- 571 18. Ong, W. S., Madlon-Kay, S. & Platt, M. L. Neuronal correlates of strategic  
572 cooperation in monkeys. *Nat. Neurosci.* (2020). doi:10.1038/s41593-020-00746-9
- 573 19. Arcaro, M. J., Mautz, T., Berezovskii, V. K. & Livingstone, M. S. Anatomical

- 574 correlates of face patches in macaque inferotemporal cortex. *Proc. Natl. Acad. Sci.*  
575 **117**, 32667–32678 (2020).
- 576 20. Wittmann, M. K., Lockwood, P. L. & Rushworth, M. F. S. Neural Mechanisms of  
577 Social Cognition in Primates. *Annu. Rev. Neurosci.* **41**, 99–118 (2018).
- 578 21. Butterfill, S. A. & Apperly, I. A. How to Construct a Minimal Theory of Mind. *Mind*  
579 *Lang.* **28**, 606–637 (2013).
- 580 22. Schurz, M. & Perner, J. An evaluation of neurocognitive models of theory of mind.  
581 *Front. Psychol.* **6**, 1–9 (2015).
- 582 23. Behrens, T. E. J., Hunt, L. T., Woolrich, M. W. & Rushworth, M. F. S. Associative  
583 learning of social value. *Nature* **456**, 245–249 (2008).
- 584 24. Sliwa, J. & Freiwald, W. A. A dedicated network for social interaction processing in  
585 the primate brain. **749**, 745–749 (2017).
- 586 25. Kilintari, M., Raos, V. & Savaki, H. E. Involvement of the Superior Temporal Cortex  
587 in Action Execution and Action Observation. *J. Neurosci.* **34**, 8999–9011 (2014).
- 588 26. Nelissen, K., Vanduffel, W. & Orban, G. A. Charting the lower superior temporal  
589 region, a new motion-sensitive region in monkey superior temporal sulcus. *J.*  
590 *Neurosci.* **26**, 5929–5947 (2006).
- 591 27. Reveley, C. *et al.* Three-dimensional digital template atlas of the macaque brain.  
592 *Cereb. Cortex* **27**, 4463–4477 (2017).
- 593 28. Popivanov, I. D., Jastorff, J., Vanduffel, W. & Vogels, R. Heterogeneous single-unit  
594 selectivity in an fMRI-defined body-selective patch. *J. Neurosci.* **34**, 95–111 (2014).
- 595 29. Verhagen, L. *et al.* Offline impact of transcranial focused ultrasound on cortical  
596 activation in primates. *Elife* **8**, 1–28 (2019).
- 597 30. Tsao, D. Y., Moeller, S. & Freiwald, W. A. Comparing face patch systems in  
598 macaques and humans. *Proc. Natl. Acad. Sci.* **105**, 19514–19519 (2008).
- 599 31. Hadj-Bouziane, F., Bell, A. H., Knusten, T. A., Ungerleider, L. G. & Tootell, R. B. H.  
600 Perception of emotional expressions is independent of face selectivity in monkey  
601 inferior temporal cortex. *Proc. Natl. Acad. Sci.* **105**, 5591–5596 (2008).
- 602 32. Van Essen, D. C. *et al.* The WU-Minn Human Connectome Project: An overview.  
603 *Neuroimage* **80**, 62–79 (2013).
- 604 33. Marciniak, K., Atabaki, A., Dicke, P. W. & Thier, P. Disparate substrates for head  
605 gaze following and face perception in the monkey superior temporal sulcus. *Elife* **3**, 1–  
606 18 (2014).
- 607 34. Fisher, C. & Freiwald, W. A. Contrasting specializations for facial motion within the  
608 macaque face-processing system. *Curr. Biol.* **25**, 261–266 (2015).
- 609 35. Bell, A. H., Summerfield, C., Morin, E. L., Malecek, N. J. & Ungerleider, L. G.  
610 Encoding of Stimulus Probability in Macaque Inferior Temporal Cortex. *Curr. Biol.*  
611 **26**, 2280–2290 (2016).
- 612 36. Wittmann, M. K. *et al.* Self-Other Mergence in the Frontal Cortex during Cooperation  
613 and Competition. *Neuron* **91**, 482–493 (2016).
- 614 37. Patel, G. H., Sestieri, C. & Corbetta, M. The evolution of the temporoparietal junction  
615 and posterior superior temporal sulcus. *Cortex* (2019).

- 616 doi:10.1016/j.cortex.2019.01.026
- 617 38. Vincent, J. L. *et al.* Intrinsic functional architecture in the anaesthetized monkey brain.  
618 *Nature* **447**, 83–86 (2007).
- 619 39. Jenkinson, M., Beckmann, C. F., Behrens, T. E. J., Woolrich, M. W. & Smith, S. M.  
620 *Fsl. Neuroimage* **62**, 782–790 (2012).
- 621 40. Van Essen, D. C. & Dierker, D. L. Surface-based and probabilistic atlases of primate  
622 cerebral cortex. *Neuron* **56**, 209–225 (2007).
- 623 41. Folloni, D. *et al.* Manipulation of Subcortical and Deep Cortical Activity in the  
624 Primate Brain Using Transcranial Focused Ultrasound Stimulation. *Neuron* **101**, 1109-  
625 1116.e5 (2019).
- 626 42. Jenkinson, M., Bannister, P., Brady, M. & Smith, S. Improved Optimization for the  
627 Robust and Accurate Linear Registration and Motion Correction of Brain Images.  
628 *Neuroimage* **17**, 825–841 (2002).
- 629 43. Jenkinson, M. & Smith, S. A global optimisation method for robust affine registration  
630 of brain images. *Med. Image Anal.* **5**, 143–156 (2001).
- 631 44. Woolrich, M. W., Ripley, B. D., Brady, M. & Smith, S. M. Temporal autocorrelation  
632 in univariate linear modeling of FMRI data. *Neuroimage* **14**, 1370–1386 (2001).
- 633 45. Woolrich, M. W., Behrens, T. E. J., Beckmann, C. F., Jenkinson, M. & Smith, S. M.  
634 Multilevel linear modelling for FMRI group analysis using Bayesian inference.  
635 *Neuroimage* **21**, 1732–1747 (2004).
- 636 46. Eklund, A., Nichols, T. E. & Knutsson, H. Cluster failure: Why fMRI inferences for  
637 spatial extent have inflated false-positive rates. *Proc. Natl. Acad. Sci.* **113**, 7900–7905  
638 (2016).
- 639 47. Nichols, T., Brett, M., Andersson, J., Wager, T. & Poline, J. B. Valid conjunction  
640 inference with the minimum statistic. *Neuroimage* **25**, 653–660 (2005).
- 641 48. Chau, B. K. H. *et al.* Contrasting Roles for Orbitofrontal Cortex and Amygdala in  
642 Credit Assignment and Learning in Macaques. *Neuron* **87**, 1106–1118 (2015).
- 643 49. Winkler, A. M., Ridgway, G. R., Webster, M. A., Smith, S. M. & Nichols, T. E.  
644 Permutation inference for the general linear model. *Neuroimage* **92**, 381–397 (2014).
- 645 50. Van Essen, D. C. *et al.* The Brain Analysis Library of Spatial maps and Atlases  
646 (BALSA) database. *Neuroimage* **144**, 270–274 (2017).
- 647 51. Mars, R. B. *et al.* Connectivity-based subdivisions of the human right ‘temporoparietal  
648 junction area’: Evidence for different areas participating in different cortical networks.  
649 *Cereb. Cortex* **22**, 1894–1903 (2012).
- 650 52. Pouget, P. *et al.* Neuronavigated Repetitive Transcranial Ultrasound Stimulation  
651 Induces Long-Lasting and Reversible Effects on Oculomotor Performance in Non-  
652 human Primates. *Front. Physiol.* **11**, 1–13 (2020).
- 653 53. Deffieux, T. *et al.* Low-intensity focused ultrasound modulates monkey visuomotor  
654 behavior. *Curr. Biol.* **23**, 2430–2433 (2013).
- 655 54. Fouragnan, E. F. *et al.* The macaque anterior cingulate cortex translates counterfactual  
656 choice value into actual behavioral change. *Nat. Neurosci.* **22**, 797–808 (2019).
- 657 55. Khalighinejad, N. *et al.* A Basal Forebrain-Cingulate Circuit in Macaques Decides It Is



658 Time to Act. *Neuron* **105**, 370-384.e8 (2020).

659

## 660 **Acknowledgments**

661 We thank Lev Tankelevitch, Caroline I. Jahn, Alessandro Bongioanni and Davide Folloni for  
662 their important contribution to the development of awake fMRI preprocessing pipeline. Human  
663 Data were provided by the HCP, WU-Minn Consortium (Principal Investigators: D. Van Essen  
664 and K. Ugurbil; 1U54MH091657) funded by the 16 NIH institutes and centers that support the  
665 NIH Blueprint for Neuroscience Research and by the McDonnell Center for Systems  
666 Neuroscience at Washington University.

667 Funding: L.R. is supported by funding from the Biotechnology and Biological Sciences  
668 Research Council (BBSRC) [BB/M011224/1]; M.S. is supported by the Austrian Science  
669 Fund: Erwin Schroedinger Fellowship [FWF-J4009-B27]; L.V. is supported by a Marie Curie  
670 Intra- European Fellowship within the European Union's 7th Framework Programme [MC-  
671 IEF-623513] and funding from the Wellcome Trust [WT100973AIA]; A.M. is supported by  
672 an MRC grant [MR/P024955/1] and the Wellcome Trust centre grant [203139/Z/16/Z]; M.K.  
673 is supported by the Centre National de la Recherche Scientifique, Mission pour  
674 l'Interdisciplinarité; M.F.S.R is supported by MRC grant [G0902373]; R.B.M. is supported by  
675 the Biotechnology and Biological Sciences Research Council (BBSRC) UK [BB/N019814/1]  
676 and the Netherlands Organization for Scientific Research NWO [452-13-015]; J.S. is supported  
677 by a Sir Henry Dale Wellcome Trust Fellowship [105651/Z/14/Z], IDEXLYON "IMPULSION  
678 2020 grant (IDEX/IMP/2020/14) a Hayward JRF from Oriel College, University of Oxford  
679 and the Labex CORTEX ANR-11-LABX-0042 of Université de Lyon; The Wellcome Centre  
680 for Integrative Neuroimaging is supported by core funding from the Wellcome Trust  
681 [203139/Z/16/Z] and Wellcome Strategic award [WT101092MA];

682

## 683 **Competing interest declaration**

684 Authors declare no competing interests.

685 **Supplementary Data**

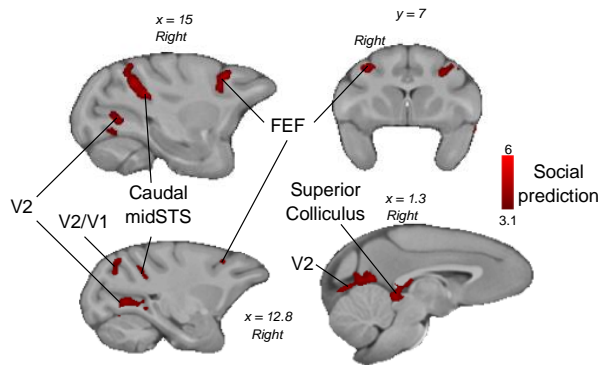

686

687 **Supplementary Figure 1 | Social prediction contrast.** Group contrast of unexpected versus  
688 expected social interaction also revealed activity in Frontal Eye Field (FEF), Superior  
689 Colliculus, Visual area V2 and Visual area V2/V1 (n=14, cluster-corrected at  $z > 3.1$ ,  $p < 0.05$   
690 FWE corrected).

691

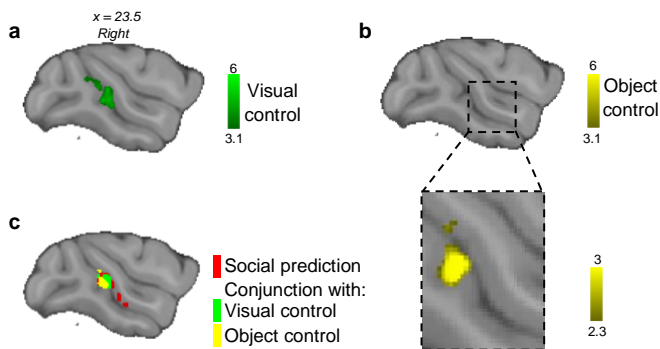

692

693 **Supplementary Figure 2 | Control conditions.** **a**, Visual control: group contrast of  
694 unexpected versus expected scrambled social scenes revealed activity in caudal midSTS only  
695 (n=14, cluster-corrected at  $z > 3.1$ ,  $p < 0.05$  FWE corrected). **b**, Non-social prediction (object)  
696 control: group contrast of unexpected versus expected object scenes revealed no activity (n=7,  
697 cluster-corrected at  $z > 3.1$  and  $p < 0.05$  FWE corrected). At lower threshold (insert), the contrast  
698 revealed activity in caudal midSTS only (cluster-corrected at  $z > 2.3$ ,  $p < 0.05$  FWE corrected).  
699 **c**, Conjunction results between the social prediction contrast and the control contrasts (cluster-  
700 corrected at  $z > 3.1$  for visual feature control and at  $z > 2.3$  for object control,  $p < 0.05$  FWE  
701 corrected).

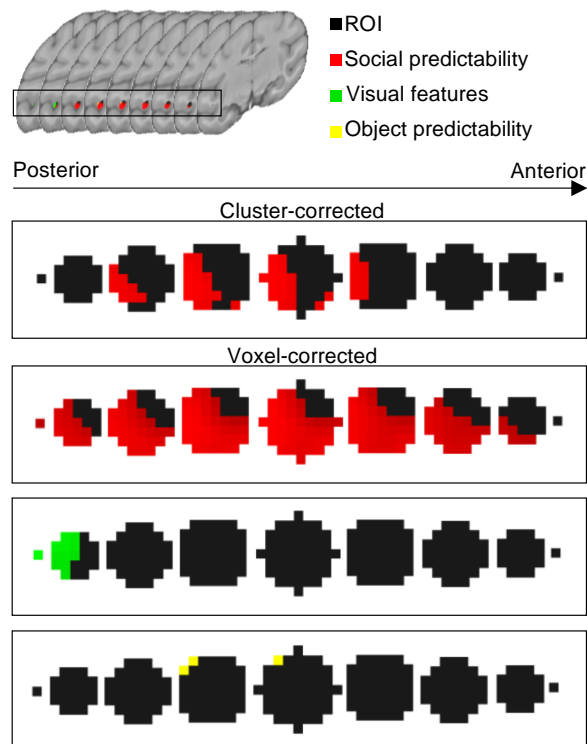

702

703 **Supplementary Figure 3 | ROI analysis cluster and voxel corrected.** Representation of the  
704 midSTS ROI from Mars et al (2013), from posterior to anterior coronal slices. When cluster-  
705 corrected ( $z > 3.1$ ) only the social prediction contrast was significant. When voxel-corrected  
706 ( $p < 0.05$ ), a few voxels in the two other controls were significant.

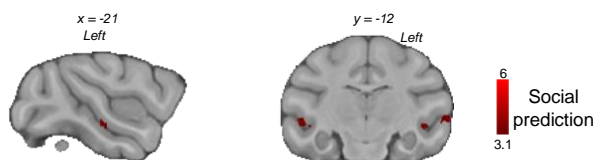

707

708 **Supplementary Figure 4 | Hemispheric analysis.** Social prediction: group contrast of  
709 unexpected versus expected social interaction restricted on a rostral midSTS ROI revealed  
710 activity in rostral on the left hemisphere midSTS ( $n = 14$ , cluster-corrected at  $z > 3.1$ ,  $p < 0.05$   
711 FWE corrected).

712

713

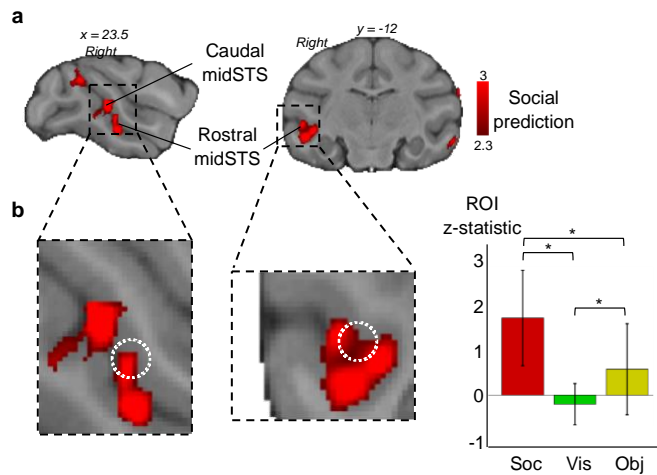

714

715 **Supplementary Figure 5 | Replication of the modulation of macaque STS activity.** a,  
716 Social prediction: group contrast of unexpected versus expected social interaction revealed  
717 activity in rostral and caudal midSTS (n=4, cluster-corrected at  $z > 2.3$ ,  $p < 0.05$  FWE corrected).  
718 b, Inserts show the white dotted circle representing a macaque TPJ-like region identified  
719 previously<sup>11</sup>. Mean Z-statistic obtained in the ROI (white circle) for social prediction (soc),  
720 visual control (vis), object control (obj). Error bars represent standard deviation (Wilcoxon  
721 signed-rank test, Bonferroni corrected for multiple comparison  $p < 0.05$ ).

722

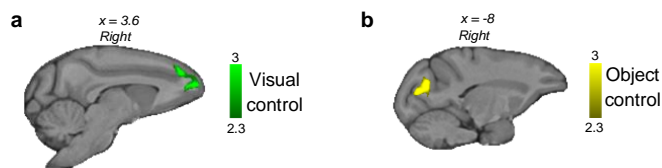

723

724 **Supplementary Figure 6 | Replication of the control conditions.** a, Visual control: group  
725 contrast of unexpected versus expected scrambled social (n=4, cluster-corrected at  $z > 2.3$ ,  
726  $p < 0.05$  FWE corrected). b, Non-social prediction (object) control: group contrast of  
727 unexpected versus expected object scenes (n=4, cluster-corrected at  $z > 2.3$  and  $p < 0.05$  FWE  
728 corrected).

729

730

731

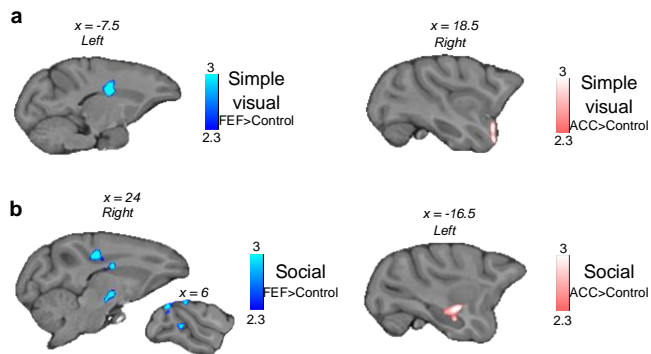

732

733 **Supplementary Figure 7 | Effect of ultrasound stimulation.** **a**, Simple visual: two-sample  
 734 paired t-test for higher activation in FEF stimulation condition (blue) or ACC (pink)  
 735 compared to control for the group contrast of videos versus black screen ( $n=4$ , cluster-corrected at  $z>2.3$ ,  
 736  $p<0.05$  FWE corrected). **b**, Social: two-sample paired t-test for higher activation in FEF  
 737 stimulation condition (blue) or ACC (pink) compared to control for the group contrast of social  
 738 videos versus scrambled videos ( $n=4$ , cluster-corrected at  $z>2.3$ ,  $p<0.05$  FWE corrected).

739

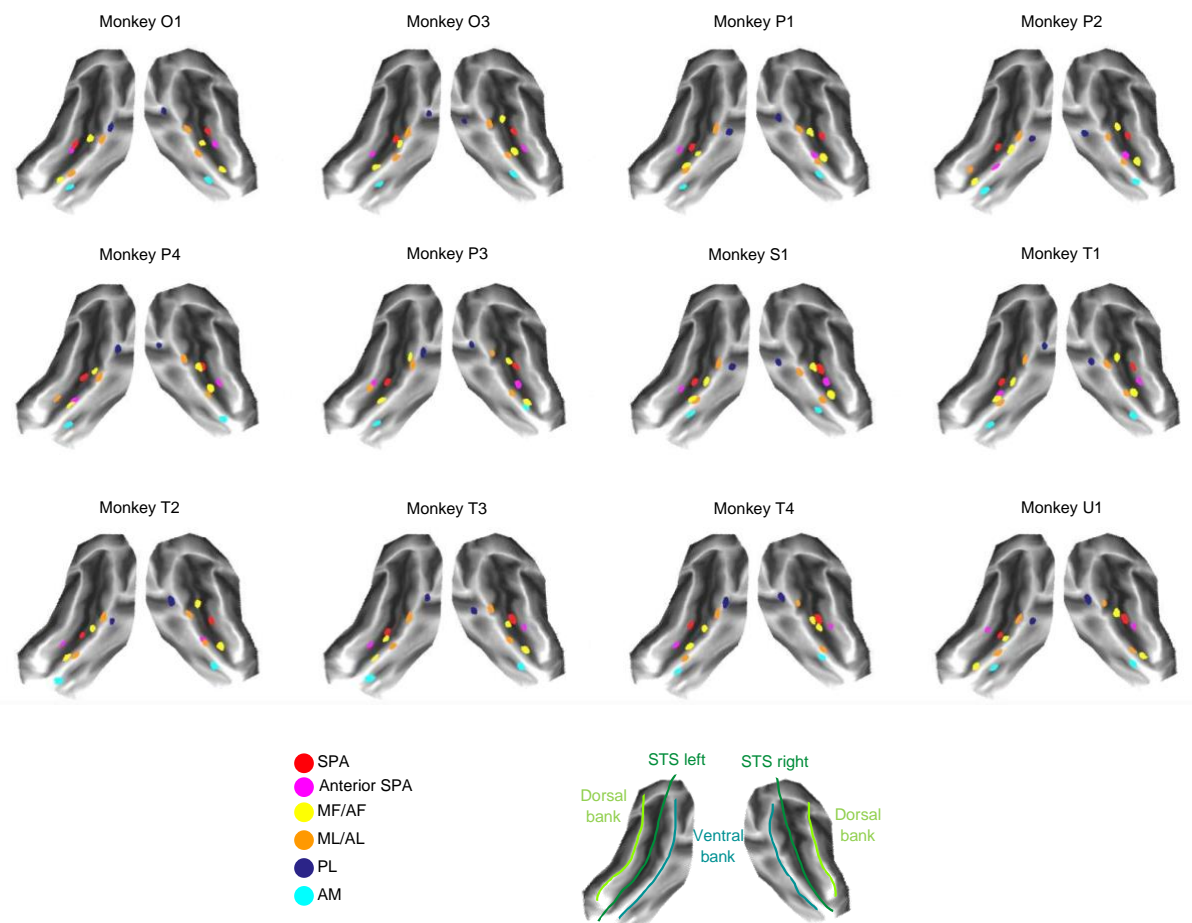

740

741 **Supplementary Figure 8 | Peak activities for individual macaques.** Peak activity for the  
 742 SPA and for the face patches represented on a flat F99 surface showing the STS with its dorsal  
 743 and ventral bank.

744 **Supplementary Table 1 | Peak activation coordinates of social prediction and controls at**  
 745 **the group level.**

|                        | Social prediction |       |       | Visual control |       |      | Object control |       |      |
|------------------------|-------------------|-------|-------|----------------|-------|------|----------------|-------|------|
|                        | x                 | y     | z     | x              | y     | z    | x              | y     | z    |
| midSTS<br>Rostral      | 24.6              | -11.6 | -2.51 |                |       |      |                |       |      |
| midSTS<br>caudal       | 22.6              | -16.6 | 3.02  | 22.1           | -17.1 | 1.51 | 23.1           | -17.1 | 1.01 |
| FEF                    | 15.1              | 7.04  | 16.6  |                |       |      |                |       |      |
| V1/V2                  | 8.05              | -37.2 | 18.1  |                |       |      |                |       |      |
| V2 lateral             | 13.6              | -33.2 | 1.01  |                |       |      |                |       |      |
| V2 medial              | 1.51              | -31.2 | 6.54  |                |       |      |                |       |      |
| Superior<br>colliculus | 2.52              | -20.1 | 1.51  |                |       |      |                |       |      |

Coordinates given for the right hemisphere in mm in F99 standard space (Social prediction and visual control: n=14, cluster-corrected at z>3.1 and p<0.05 FWE corrected, object control: n=7, cluster-corrected at z>2.3 and p<0.05 FWE corrected).

746 **Supplementary Table 2 | Peak activation coordinates of social prediction at the group**  
 747 **level for the replication study.**

|                     | x     | y     | z     |
|---------------------|-------|-------|-------|
| midSTS<br>Rostral   | 21    | -12.6 | -4.9  |
| midSTS<br>caudal    | 20.1  | -20.6 | 4.02  |
| FEF                 | -18.1 | 7.04  | 20.1  |
| Parietal area<br>PG | 10.6  | -37.2 | 19.6  |
| aSTS                | -28.2 | -10.1 | -8.05 |

Coordinates given in mm in F99 standard space (n=4, cluster-corrected at z>2.3 and p<0.05 FWE corrected).

751 **Supplementary Table 3 | Peak activation coordinates of the face localizer at the group**  
 752 **level.**

|     | Right |       |       | Left  |       |       |
|-----|-------|-------|-------|-------|-------|-------|
|     | x     | y     | z     | x     | y     | z     |
| AM  | 21.1  | -1.5  | -16.3 | -20.5 | -0.7  | -14.7 |
| AF  | 22.6  | -2    | -10.1 | -20.5 | -5.2  | -9.8  |
| AL  | 24.6  | -0.9  | -9.5  | -22.5 | -1.17 | -10.6 |
| MF  | 25.2  | -15.6 | -0.5  | -22.0 | -14.6 | -4.6  |
| ML  | 30.7  | -16.1 | 4.5   | -27.6 | -17.2 | 2.5   |
| FEF | 21.1  | 10.6  | 8.6   | -21.1 | 10.6  | 6.54  |

Coordinates given for the right and left hemisphere in mm in F99 standard space (n=14, cluster-corrected at z>3.1 and p<0.05 FWE corrected).

756

757 **Supplementary Table 4 | Detail of the monkeys and number of runs per subjects and per**  
758 **conditions selected for analysis.**

| Monkey ID    | Age (years) | Weight (kg) | Social prediction | Object control | Faces |
|--------------|-------------|-------------|-------------------|----------------|-------|
| O1           | 13          | 12          | 10                | 0              | 13    |
| O2           | 13          | 12          | 4                 | 0              | 9     |
| O3           | 13          | 12          | 9                 | 0              | 13    |
| P1           | 12          | 11          | 11                | 0              | 12    |
| P2           | 12          | 11.5        | 8                 | 0              | 9     |
| P3           | 12          | 11.5        | 10                | 0              | 9     |
| P4           | 12          | 11.5        | 10                | 0              | 11    |
| S1*          | 9           | 7.5         | 8                 | 8              | 10    |
| T1           | 8           | 11.5        | 5                 | 10             | 10    |
| T2           | 8           | 14          | 10                | 10             | 9     |
| T3           | 8           | 12          | 10                | 9              | 9     |
| T4           | 8           | 13          | 8                 | 11             | 10    |
| U1           | 7           | 13          | 8                 | 10             | 10    |
| U2           | 7           | 11          | 10                | 8              | 11    |
| Total (n=14) |             |             | 121               | 66 (n=7)       | 145   |

\*Female

759
